# Supplementary material for: Phenotypic Detection of Hemin-Inducible Trimethoprim-Sulfamethoxazole Heteroresistance in Staphylococcus aureus
Source: PubMed Central journal article supplement (PMC8549745; doi:10.1128/spectrum.01510-21), 2021-10-27

## Supplementary Appendix

### Phenotypic detection of hemin-inducible trimethoprim-sulfamethoxazole hetero-resistance in *Staphylococcus aureus*

Dennis Nurjadi<sup>1#</sup>, Quan Chanthalangsy<sup>1</sup>, Elfi Zizmann<sup>1</sup>, Vanessa Stuermer, Maximilian Moll<sup>1</sup>, Sabrina Klein<sup>1</sup>, Sébastien Boutin<sup>1</sup>, Klaus Heeg<sup>1</sup>, Philipp Zanger<sup>1,2</sup>

<sup>1</sup>Department of Infectious Diseases, Medical Microbiology and Hygiene, Heidelberg University Hospital, Im Neuenheimer Feld 324, 69120 Heidelberg, Germany

<sup>2</sup>Heidelberg Institute of Global Health, Heidelberg University Hospital, Im Neuenheimer Feld 130, 69120 Heidelberg, Germany

#### Table of contents

|                                                                                                                                                  |   |
|--------------------------------------------------------------------------------------------------------------------------------------------------|---|
| Supplementary Figure S1. The different phenotypic resistance growth characteristics on Mueller-Hinton Agar supplemented with 5% horse blood..... | 2 |
| Supplementary Figure S2. Stability of heteroresistance phenotype. ....                                                                           | 3 |
| Supplementary Figure S3. Photometric population analysis profile. ....                                                                           | 4 |
| Supplementary Figure S4. Association between MLST and heteroresistance phenotype in <i>Staphylococcus aureus</i> . ....                          | 5 |
| Supplementary Figure S5. Auxotrophy testing. ....                                                                                                | 6 |

Running title: monoclonal SXT heteroresistance *S. aureus*

**Supplementary Figure S1. The different phenotypic resistance growth characteristics on Mueller-Hinton Agar supplemented with 5% horse blood.**

D2201=fully resistant phenotype; KE7160=low-density heteroresistance phenotype; D2198=high-density heteroresistance phenotype; ATCC25923=fully susceptible phenotype

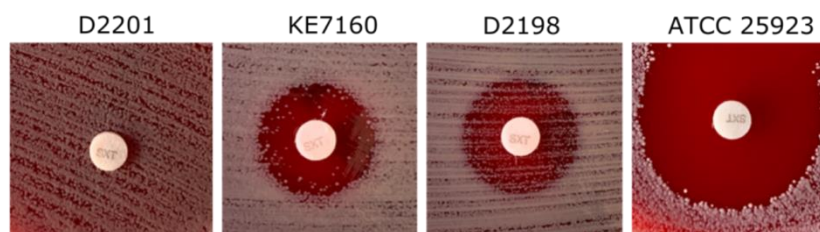

Running title: monoclonal SXT heteroresistance *S. aureus*

**Supplementary Figure S2. Stability of heteroresistance phenotype.**

Agar diffusion of a colony of trimethoprim-sulfamethoxazole resistant phenotype subcultured for 4 consecutive days exhibited similar heteroresistance phenotype as the original clone.

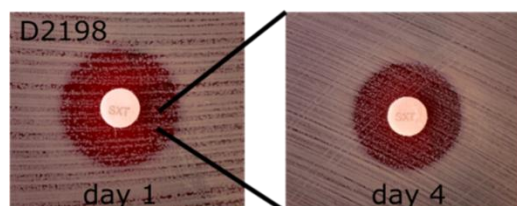

**Supplementary Figure S3. Photometric population analysis profile.**

Photometric growth analysis, measured at OD<sub>590nm</sub> in various trimethoprim-sulfamethoxazole (1:19) concentrations in Mueller-Hinton broth without (a) and with 2.5 UI/ml thymidine phosphorylase (b). SXT concentration is expressed as concentration of trimethoprim component. Abbreviations: TP=thymidine phosphorylase, SXT=trimethoprim-sulfamethoxazole

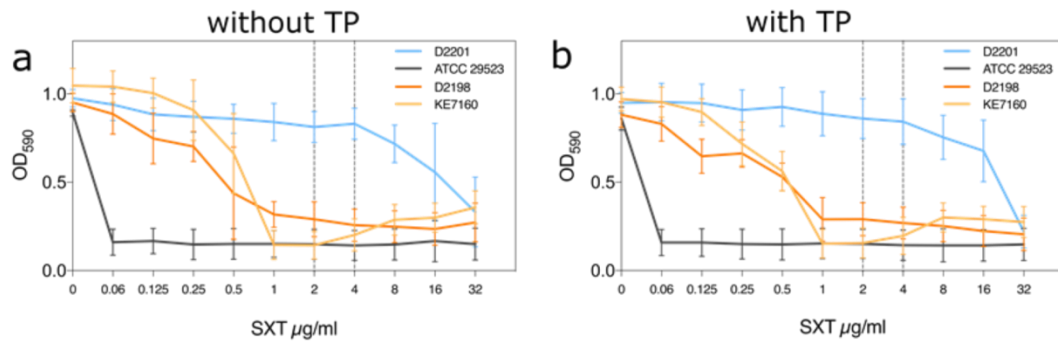

**Supplementary Figure S4. Association between MLST and heteroresistance phenotype in *Staphylococcus aureus*.**

The heteroresistant phenotype towards trimethoprim-sulfamethoxazole is not confined to a particular ST-group. Only MLST with  $\geq 2$  isolates (n=81/95) were included in this analysis. Two isolates with fully resistant phenotype were not included in the figure. Abbreviations: MLST=multi-locus sequence typing; ST=sequence type

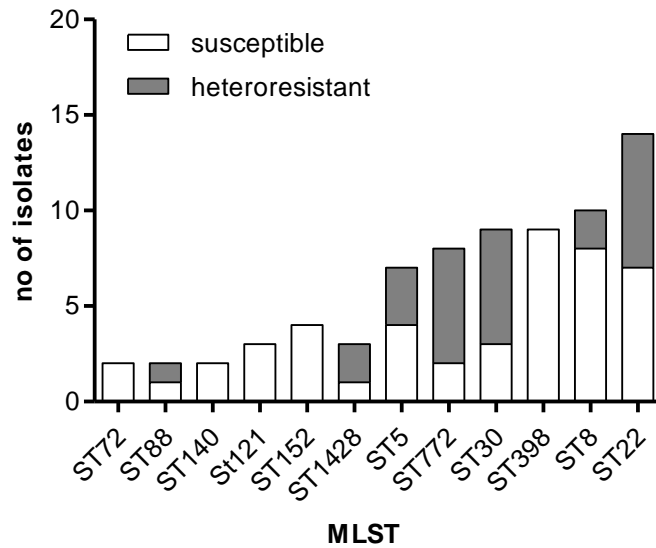

Running title: monoclonal SXT heteroresistance *S. aureus*

**Supplementary Figure S5. Auxotrophy testing.**

*Staphylococcus aureus* isolates D2198 and KE7160 did not exhibit thymidine, menadione or hemin auxotrophy. Both isolates exhibited normal growth on Mueller-Hinton agar and the presence of thymidine (T), menadione (M) or Hemin (X) did not change growth characteristics of the colony.

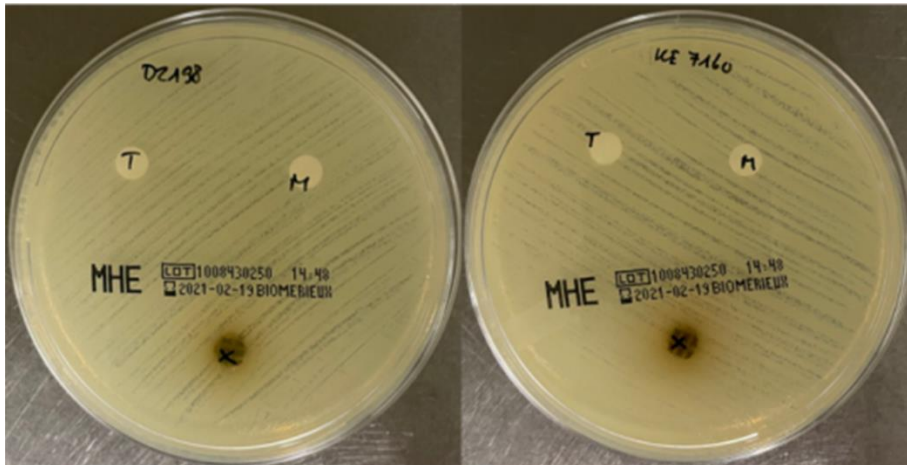

Supplement: spectrum01510-21_supp_1_seq1.pdf [file spectrum01510-21_supp_1_seq1.pdf]
