# Supplementary material for: Phenotypic Detection of Hemin-Inducible Trimethoprim-Sulfamethoxazole Heteroresistance in Staphylococcus aureus
Source: PubMed Central journal article supplement (PMC8549745; doi:10.1128/spectrum.01510-21), 2021-10-27
Supplement: reviewer-comments.pdf [file reviewer-comments.pdf]

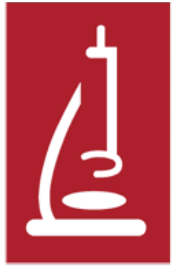

AMERICAN  
SOCIETY FOR  
MICROBIOLOGY

**Microbiology  
Spectrum**

# Phenotypic detection of hemin-inducible trimethoprim-sulfamethoxazole heteroresistance in *Staphylococcus aureus*

Dennis Nurjadi, Quan Chanthalangsy, Elfi Zizmann, Vanessa Stuermer, Maximilian Moll, Sabrina Klein, Sébastien Boutin, Klaus Heeg, and Philipp Zanger

*Corresponding Author(s): Dennis Nurjadi, Heidelberg University Hospital*

---

## Review Timeline:

Submission Date:

September 10, 2021

Accepted:

September 17, 2021

---

*Editor: Kunyan Zhang*

*Reviewer(s): The reviewers have opted to remain anonymous.*

## Transaction Report:

(Note: With the exception of the correction of typographical or spelling errors that could be a source of ambiguity, letters and reports are not edited. The original formatting of letters and referee reports may not be reflected in this compilation.)

**DOI: <https://doi.org/10.1128/Spectrum.01510-21>**

September 17, 2021

Dr. Dennis Nurjadi  
Heidelberg University Hospital  
Department of Infectious Diseases (Medical Microbiology and Hygiene)  
Im Neuenheimer Feld 324  
Heidelberg  
Germany

Re: Spectrum01510-21 (Phenotypic detection of hemin-inducible trimethoprim-sulfamethoxazole heteroresistance in *Staphylococcus aureus*)

Dear Dr. Dennis Nurjadi:

I have reviewed the previous reviewers' comments from JCM, your responses and your revised manuscript. I think you have addressed all the comments and concerns. Your work has merit. I decide to accept your manuscript in the current format to be published in Microbiology Spectrum.

I am forwarding it to the ASM Journals Department for publication. You will be notified when your proofs are ready to be viewed.

The ASM Journals program strives for constant improvement in our submission and publication process. Please tell us how we can improve your experience by taking this quick [Author Survey](#).

As an open-access publication, Spectrum receives no financial support from paid subscriptions and depends on authors' prompt payment of publication fees as soon as their articles are accepted. You will be contacted separately about payment when the proofs are issued; please follow the instructions in that e-mail. Arrangements for payment must be made before your article is published. For a complete list of **Publication Fees**, including supplemental material costs, please visit our [website](#).

Corresponding authors may [join or renew ASM membership](#) to obtain discounts on publication fees. Need to upgrade your membership level? Please contact Customer Service at [Service@asmusa.org](mailto:Service@asmusa.org).

Thank you for submitting your paper to Spectrum.

Sincerely,

Kunyan Zhang  
Editor, Microbiology Spectrum

Journals Department  
American Society for Microbiology  
1752 N St., NW  
Washington, DC 20036

E-mail: [spectrum@asmusa.org](mailto:spectrum@asmusa.org)

Supplemental Material: Accept
